# Supplementary material for: Underestimated Peripheral Effects Following Pharmacological and Conditional Genetic Microglial Depletion
Source: MDPI journal article supplement (doi:10.3390/ijms21228603), 2020-11-15
Supplement: s1 [file s1]

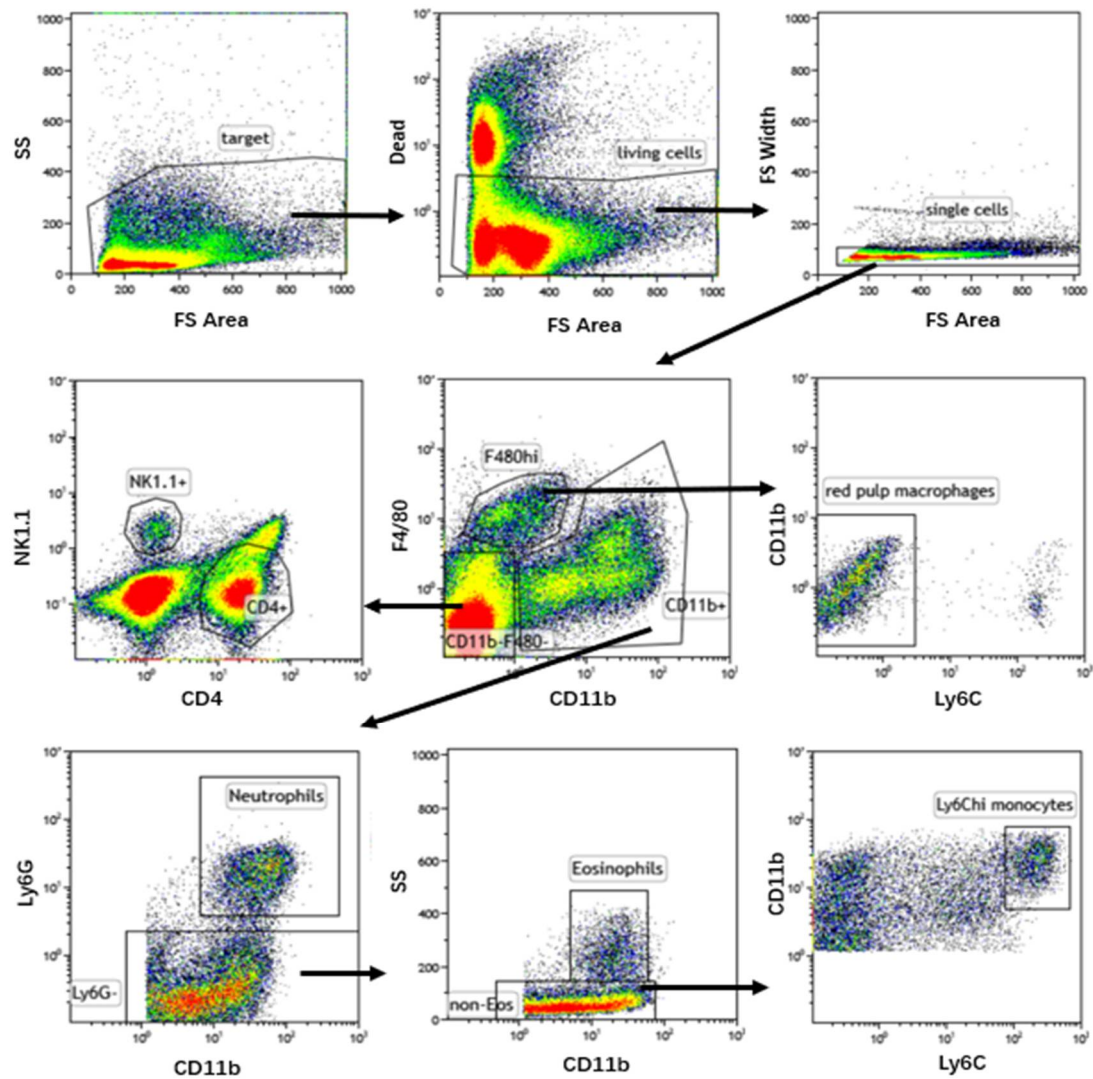

*Supplementary Figure S1: Splenic flow cytometry gating strategy.*

### Gating strategy

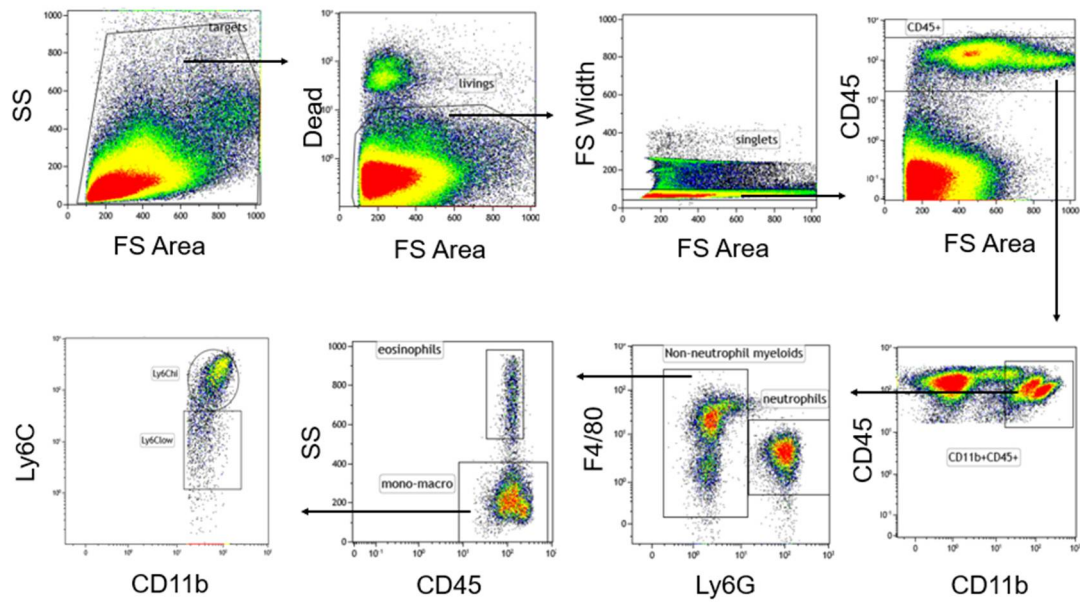

**Supplementary Figure S2:** Gating strategy of monocytes in the circulation.

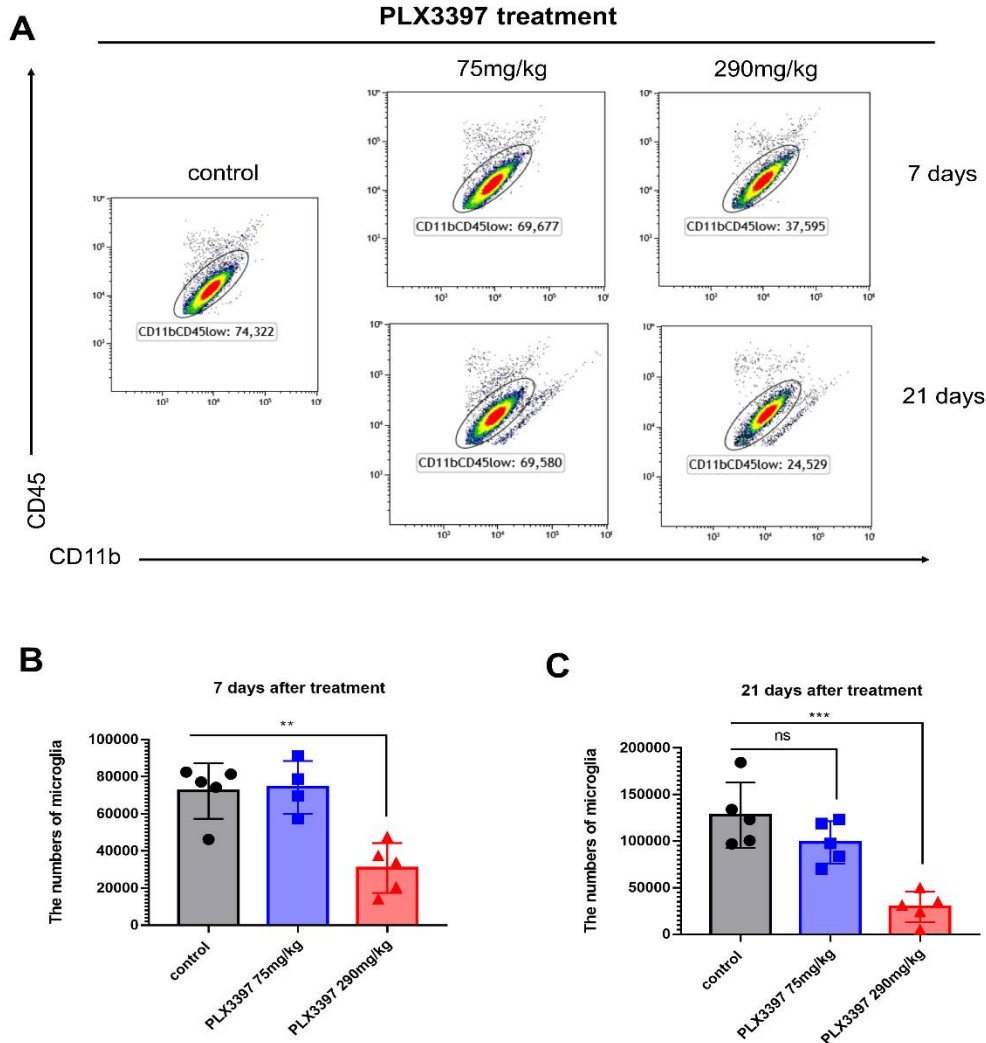

**Supplementary Figure S3: Lower dose of PLX3397 treatment fails to effectively deplete microglia.** (A) Representative flow cytometry plots of CD11b<sup>+</sup>CD45<sup>low</sup>Ly6C<sup>-</sup>Ly6G<sup>-</sup> microglia of the hemi-brains in *C57BL/6NTac* mice following consecutive PLX3397 diet (7 and 21 days) with two distinct doses of 75mg/kg and 290mg/kg, respectively. Control mice were treated with normal diet. (B) Total CD11b<sup>+</sup>CD45<sup>low</sup>Ly6C<sup>-</sup>Ly6G<sup>-</sup> microglial counts ( $\pm$ SEM) of the hemi-brains 7 days following PLX3397 treatment (control, black bars; PLX3397 treatment with the dose of 75mg/kg, blue bars; PLX3397 treatment with the dose of 290mg/kg, red bars). (C) Total CD11b<sup>+</sup>CD45<sup>low</sup>Ly6C<sup>-</sup>Ly6G<sup>-</sup> microglial counts ( $\pm$ SEM) of the hemi-brains 21 days following PLX3397 diet with a dose of 75mg/kg (control, black bars; PLX3397 treatment with the dose of 75mg/kg, blue bars; PLX3397 treatment with the dose of 290mg/kg, red bars). Statistical significance is indicated as \* $p < 0.05$ , \*\* $p < 0.01$  and \*\*\* $p < 0.001$ .
